# Supplementary material
Source: PubMed Central journal article supplement (PMC3149759)

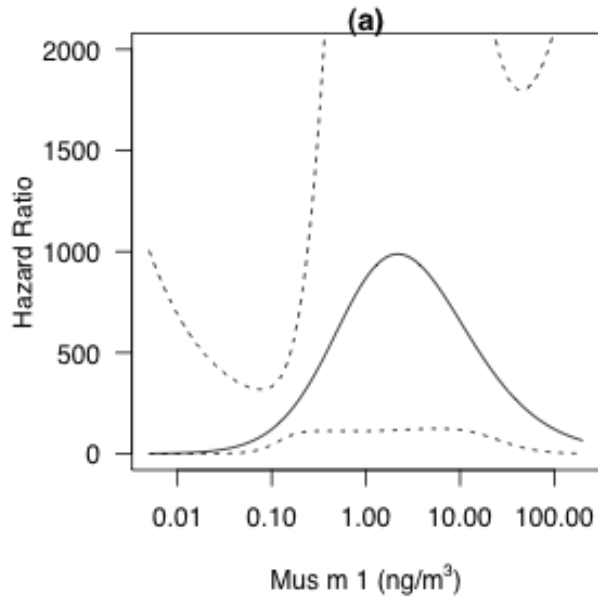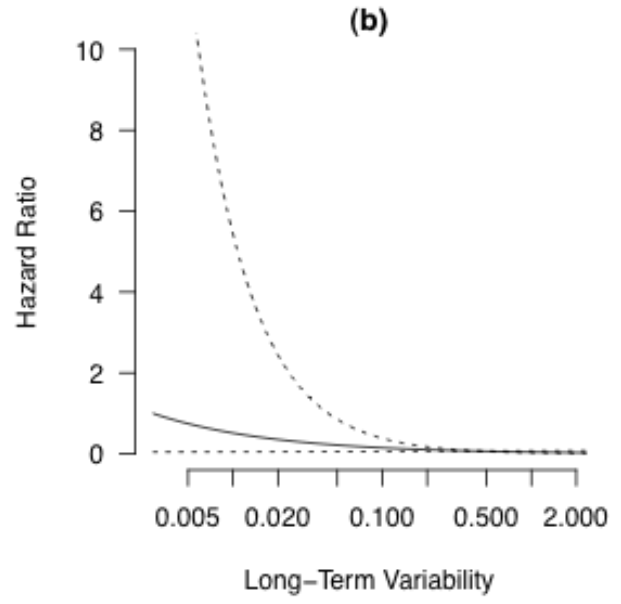

Supplement: NIHMS297300-supplement-2.pdf [file NIHMS297300-supplement-2.pdf]
